1 **Variation and constraints in hybrid genome formation**

2

3 Anna Runemark<sup>1\*</sup>, Cassandra N. Trier<sup>1</sup>, Fabrice Eroukhmanoff<sup>1</sup>, Jo S. Hermansen<sup>1</sup>,

4 Michael Matschiner<sup>1</sup>, Mark Ravinet<sup>1</sup>, Tore O. Elgvin<sup>1</sup>, and Glenn-Peter Sætre<sup>1</sup>

5

6 **Affiliations:**

7 <sup>1</sup>Department of Biosciences, Centre for Ecological and Evolutionary Synthesis,

8 University of Oslo, PO Box 1066, N-0316, Oslo, Norway.

9

10 \*Corresponding author. Email: [anna.runemark@ibv.uio.no](mailto:anna.runemark@ibv.uio.no) (A.R.).

11

12 **Summary**

13 **Recent genomic investigations have revealed hybridization to be an important**  
14 **source of variation, the working material of natural selection<sup>1,2</sup>. Hybridization**  
15 **can spur adaptive radiations<sup>3</sup>, transfer adaptive variation across species**  
16 **boundaries<sup>4</sup>, and generate species with novel niches<sup>5</sup>. Yet, the limits to viable**  
17 **hybrid genome formation are poorly understood. Here we investigated to what**  
18 **extent hybrid genomes are free to evolve or whether they are restricted to a**  
19 **specific combination of parental alleles by sequencing the genomes of four**  
20 **isolated island populations of the homoploid hybrid Italian sparrow *Passer***  
21 ***italiae*<sup>6,7</sup>. Based on 61 Italian sparrow genomes from Crete, Corsica, Sicily and**  
22 **Malta, and 10 genomes of each of the parent species *P. domesticus* and *P.***  
23 ***hispaniolensis*, we report that a variety of novel and fully functional hybrid**  
24 **genomic combinations have arisen on the different islands, with differentiation**  
25 **in candidate genes for beak shape and plumage colour. There are limits to**  
26 **successful genome fusion, however, as certain genomic regions are invariably**  
27 **inherited from the same parent species. These regions are overrepresented on**  
28 **the Z-chromosome and harbour candidate incompatibility loci, including DNA-**  
29 **repair and mito-nuclear genes; loci that may drive the general reduction of**  
30 **introgression on sex chromosomes<sup>8</sup>. Our findings demonstrate that hybridization**  
31 **is a potent process for generating novel variation, but variation is limited by**  
32 **DNA-repair and mito-nuclear genes, which play an important role in**  
33 **reproductive isolation and thus contribute to speciation.**

34

35

36 Introgressive hybridization can transfer adaptive genetic variation across species  
37 boundaries<sup>4</sup> and generate new species<sup>2,4,5</sup>. Although historically thought to be  
38 unimportant in animals, the genomic revolution has shown hybridization to be a  
39 pervasive evolutionary force, common in both plants and animals,<sup>1,2</sup> and one that has  
40 even shaped the genome of our own species<sup>8</sup>. Portions of the genome vary in extent of  
41 introgression<sup>4,9</sup>, and homoploid hybrid genomes are predicted to have unequal  
42 parental contributions<sup>10</sup>. However, how hybridization, and subsequent recombination  
43 and selection mold genomes is not well understood. For instance, it is not known what  
44 determines the relative contribution of each parent and whether the genomic locations  
45 of introgression are subject to constraints or are largely stochastic. Moreover,  
46 genomic constraints in hybridizing taxa can be used to identify genes involved in  
47 reproductive isolation between species as they do not introgress<sup>7</sup>, and hence are  
48 important for our understanding of speciation and how biodiversity arises. One well-  
49 supported finding is reduced introgression on sex chromosomes, which is common in  
50 species where one sex is heterogametic<sup>8,11</sup>. To what extent this pattern is caused by  
51 specific types of genes on sex chromosomes is debated<sup>12</sup>, and knowledge of the genes  
52 causing incompatibilities and reproductive isolation is needed to resolve this.

53

54 To investigate whether certain genes must be inherited from a specific parent species  
55 to form a stable and functional hybrid genome and whether divergent genomes can  
56 arise from hybridization, genome-wide data from multiple independent hybrid  
57 populations are required. We studied isolated island populations of the homoploid  
58 hybrid Italian sparrow *Passer italiae*<sup>6,7</sup> (Fig. 1a) to determine the constraints on, and  
59 variability of, genome regions and gene categories. The Italian sparrow genome is a  
60 mosaic of the genomes of its parent species, the house *P. domesticus* and Spanish *P.*

61 *hispaniolensis*<sup>13</sup> sparrows. The species is thought to have originated when house  
62 sparrows colonized the Mediterranean less than 10,000 years ago<sup>6,14</sup>. Morphologically  
63 divergent populations of Italian sparrows are found on the Mediterranean islands of  
64 Crete, Corsica, Sicily and Malta (Fig 1a; <sup>15</sup>) and we used these isolated island  
65 populations to investigate genome-wide patterns of divergence and differentiation  
66 from the parent species and within the hybrid species (Supplementary Tables 1-2).  
67 We sequenced 10-21 Italian sparrow genomes from each island and 10 genomes from  
68 each of the parent species to 6-16X coverage as well as a tree sparrow (*P. montanus*)  
69 as an outgroup and aligned them to the recently *de novo* assembled house sparrow  
70 reference genome<sup>13</sup>.

71

72 To determine if these Italian sparrow island populations were genomically  
73 differentiated, we first used a principal component analysis. Our results show strong  
74 support for differentiation among the hybrid island populations and from the parent  
75 species (Fig 1b; Supplementary Fig. 1; Supplementary Tables 3-4). The Italian  
76 sparrow populations differ in position along the axis of divergence of the parent  
77 species, with Crete and Corsica closer to house sparrow and Sicily and Malta closer to  
78 Spanish sparrow (Supplementary Table 5). To further investigate population  
79 differentiation, we assessed the most likely number of genetic clusters in the data, and  
80 the individual probability of belonging to these clusters using a structure analysis. We  
81 found support for two clusters (Supplementary Table 6) corresponding to the parent  
82 species and intermediate assignment probabilities for the Italian populations, with  
83 Crete and Corsica having the highest probabilities of clustering with house sparrow  
84 and Sicily and Malta the highest probabilities of clustering with Spanish sparrow (Fig.  
85 1c). The assignment probabilities differed significantly among populations (ANOVA

86  $F_{3,47}=736.54$ ,  $P=2.2e-16$ ; Supplementary Table 7), and across the genome  
87 (Supplementary Fig. 2). Moreover, in the most frequent phylogenetic tree topology,  
88 house sparrow, Crete and Corsica form one cluster and Spanish sparrow, Malta and  
89 Sicily the other, with Crete and Malta clustering most closely with parent species  
90 (Fig. 1d and Supplementary Fig. 3). The phylogenetic clustering varied spatially over  
91 the genome (Fig. 1e; Supplementary Table 8). We also found significantly higher  
92 Spanish sparrow introgression in the Sicily and Malta populations (Patterson's D:  
93 ANOVA  $F_{3,115}=22.52$ ,  $P<0.001$ ; Supplementary Table 9). The non-recombining  
94 mitochondrial DNA was similar to that of house sparrow for all Italian sparrows, with  
95 the exception of one Corsican individual having Spanish sparrow mitochondrial  
96 DNA, and two Maltese individuals appearing to have both house and Spanish sparrow  
97 mitochondria (Fig. 1f). This is consistent with heteroplasmy, as previously reported  
98 for mainland Italian sparrows<sup>13</sup>.  
99  
100 To address whether differentiation within a hybrid species is likely to result from  
101 positive selection or if differentiated areas mainly arise as a by-product of long-term  
102 linked background selection in low recombination areas<sup>16</sup>, we first investigated  
103 whether differentiation among Italian populations correlates with that between the  
104 parent species. We then tested whether variation in differentiation reflects variation in  
105 recombination rate, as has previously been shown in flycatchers<sup>16</sup>. Differentiation  
106 among the Italian sparrow populations was not strongly correlated with differentiation  
107 between the parents, (Supplementary Fig. 4). The standardized slope (beta) of the  
108 relationship between within-Italian differentiation and recombination rate was much  
109 shallower than that between the parent species differentiation and recombination rate  
110 (Supplementary Fig. 4; Tables S10-S11), and we therefore find no strong evidence for

111 house sparrow recombination rate accounting for the genomic heterogeneity observed  
112 within this hybrid species. Sorting of parental variants, potentially due to Hill-  
113 Robertson effects<sup>17</sup>, may have contributed to this reduction in differentiation in low  
114 recombination regions compared to that of the parent species. Regions with high  
115 differentiation may instead reflect divergent selection, or, alternatively, the  
116 recombination landscape may be altered following hybridization and spur  
117 differentiation in other areas of the genome in the hybrid than in its parents.  
118  
119 To identify regions under divergent selection in the hybrid Italian sparrow we  
120 extracted the windows where the island populations were most divergent (measured  
121 as relative similarity to the parent species in terms of  $F_{ST}$ ). Among the genes found in  
122 the 1% windows that are most divergent between the island populations, 43 different  
123 gene ontology (GO) categories were overrepresented relative to the rest of the  
124 genome (Supplementary Table 12). Among these categories were genes related to  
125 neuron function, including nervous system development, transmission of nerve  
126 impulse, and synaptic transmission (Supplementary Table 12), suggesting that these  
127 categories of genes have been under divergent selection. Interestingly, genes related  
128 to neuron function have also been targets of recent positive selection in great tits<sup>18</sup>.  
129 The outliers also included FGF10, a gene explaining beak shape divergence between  
130 Darwin's finches<sup>19</sup>. Sicily and Crete were strongly divergent at this beak shape  
131 candidate gene and the Italian sparrow has previously been shown to exhibit adaptive  
132 beak shape divergence<sup>20</sup> (Fig. 2a-c). A gene involved in feather development<sup>21</sup> and  
133 melanogenesis<sup>22</sup>, *wnt7A*, was also a highly differentiated outliers among the  
134 otherwise genetically very similar (mean  $F_{ST}$ =0.016) but plumage-wise divergent  
135 Sicilian and Maltese populations<sup>15</sup> (Fig. 2d-f and Supplementary Table 12). These two

136 examples underscore that repeated hybridization between the same parental species  
137 can generate locally adapted populations through reshuffling of parental alleles at  
138 biologically important loci.

139

140 To identify areas of unique Italian sparrow evolution, we targeted regions in which  
141 the Italian sparrow populations have diverged from both parents by extracting the 1%  
142 of windows exhibiting the largest differences in  $F_{ST}$  between each Italian/parent  
143 comparison, only keeping windows overlapping between hybrid/parent in both  
144 comparisons. We found 12 overrepresented GO categories (Supplementary Table 13)  
145 including circadian rhythm, entrainment of circadian clock and rhythmic process:  
146 these genes showed strong signals of stabilizing selection (Fig. 2g), and elevated  
147 linkage disequilibrium (Supplementary Table 14). These results illustrate how  
148 population specific selection in concert with the parental mosaic is able to form  
149 unique features in the genomes of hybrid populations.

150

151

152 The level of differentiation between the Italian sparrow and the parent species is  
153 elevated on the Z-chromosome compared to autosomes (Paired t-test;  $t_3=-8.40$ ;  
154  $P=0.004$ ; Supplementary Fig. 5-6). This is expected based on the lower effective  
155 population size of this sex chromosome and hence elevated rates of genetic drift<sup>23</sup>.  
156 However, increased differentiation on the Z-chromosome is also expected from the  
157 faster X(Z) effect of elevated rates of adaptive evolution on the macro sex  
158 chromosome due to hemizygous exposure<sup>24</sup>. Outlier loci are strongly overrepresented  
159 on the Z-chromosome (Fig. 2h; all  $P$ 's<0.001; Supplementary Table 15), except for  
160 the outliers in the category where Italian populations invariably had inherited Spanish

161 sparrow alleles, none of which resided on the Z. Interestingly, Tajima's D estimates  
162 for the Z-chromosome have significantly higher variance than those for the autosomes  
163 (Fig 2c; Repeated measures ANOVA  $F_{1,3}=56.94$ ;  $P=0.005$ ; Supplementary Fig. 7-8)  
164 and  $dn/ds$  was higher on the Z-chromosome compared to autosomes (goodness of fit  
165  $P<0.001$  for fixed differences against both house and Spanish sparrows;  
166 Supplementary Table 16), supporting a role for selection driving strong Z-  
167 chromosome divergence.

168  
169 Across taxa with heteromorphic sex chromosomes, introgression on sex chromosomes  
170 is reduced<sup>8,11</sup>. To detect loci potentially important in causing such reduction in  
171 introgression on the sex chromosomes, we identified regions invariably inherited from  
172 a specific parent across all populations. We summed the  $F_{ST}$  against house sparrow  
173 across island populations and subtracted the summed  $F_{ST}$  against Spanish sparrow  
174 before extracting the extremes at both ends of the distribution (the 2% of the windows  
175 with squared values most diverged from 0; Supplementary Table 17). We found  
176 strong evidence for genes invariably inherited from house sparrow, especially on the  
177 Z-chromosome. DNA damage stimuli were significantly overrepresented among these  
178 genes ( $P_{DNArepair}=0.026$ ). There were 11 mitonuclear loci and although these were not  
179 generally overrepresented ( $P_{mitonuclear}=0.11$ ), 7 were found in the areas on the Z-  
180 chromosome strongly constrained to house sparrow inheritance, including the  
181 previously identified candidate incompatibility gene *HSDL2*<sup>7</sup> (Supplementary Table  
182 18; Fig. 3). There were also 6 DNA mismatch-repair genes on the Z-chromosome,  
183 among them the candidate incompatibility gene *GTF2H2*<sup>7</sup> which is involved in  
184 nucleotide excision repair (Fig. 3). This suggests that hybrid genome formation is  
185 restricted to uniparental inheritance for these gene classes.



186

187 Whereas mito-nuclear genes are known as drivers of reproductive isolation<sup>7</sup> and are  
188 expected to be under selection to interact with the frequent house sparrow-like  
189 mitochondria, the role for DNA repair genes is less established. However, reduced  
190 DNA repair functioning<sup>25</sup> has been found in *Xiphophorus* fish hybrids, and the  
191 mismatch repair systems have been shown to contribute to meiotic sterility and cause  
192 incompatibilities in yeast<sup>26</sup>. Hence, multigenic DNA repair pathways may need parent  
193 specific inheritance to function. As most of these outlier genes were located on the Z-  
194 chromosome, they may contribute to the pattern of reduced introgression on sex  
195 chromosomes<sup>7</sup>.

196

197 Our comparison of isolated homoploid hybrid populations formed from the same  
198 parent species combination reveals that hybridization can produce diverged genomes  
199 with a range of different proportions of parental contribution. More outlier genes  
200 exhibited invariable inheritance from house sparrows than from Spanish sparrows.  
201 This suggests that parts of the genome must be inherited exclusively from one of the  
202 parent species, while the rest of the genome may vary with respect to parent species  
203 inheritance. Purging of Dobzhansky-Muller incompatibilities<sup>27</sup> has been suggested to  
204 be important for shaping hybrid genomes. We find that house sparrow DNA-repair  
205 genes and mito-nuclear genes are necessary for "escaping the mass of unfit  
206 recombinants"<sup>28</sup>, most likely due to epistatic interactions. Genes invariably inherited  
207 from the Spanish sparrow are fewer but include a candidate pigmentation gene  
208 *WNT4*<sup>29</sup> and a gene involved in vision, *OLFML2B*<sup>30</sup>, hence affecting external  
209 phenotype rather than genome function. Hence, both genome and organismal function

210 can constrain hybrid genome formation, and the relative importance of the two may  
211 vary both quantitatively and qualitatively with the parent species.

212

213 Our data suggests that hybridization is a more potent force for creating novel variation  
214 than previously recognised, as many different combinations of the parental genomes  
215 can arise in hybrids and allow for adaptive divergence between isolated populations  
216 of the hybrid species. Importantly, we show that the variation is limited for DNA-  
217 repair and mitochondrial genes. These may contribute to the general pattern of  
218 reduced introgression on sex chromosomes, and are candidate loci for reproductive  
219 loci that may be important in speciation.

220

## 221 **Methods**

### 222 **Field sampling**

223 Italian sparrows were caught on Crete, Corsica and Sicily in 2013 and on Malta in  
224 2014, while Spanish sparrows were caught in Lesina, Italy, 2008. House sparrows  
225 were caught in Northern Norway between 2007 and 2013, and the outgroup tree  
226 sparrow was caught in Sicily during 2008 (Supplementary Table 1). All sparrows  
227 were caught using mist nets, and blood was sampled from the brachial vein and  
228 immediately stored in Queens lysis buffer. Sparrows were released immediately after  
229 blood sampling to minimize stress. All permits were obtained from appropriate  
230 authorities prior to sampling.

231

### 232 **Whole genome resequencing, data processing and analysis**

#### 233 **DNA extraction and sequencing**

234 DNA was extracted from blood samples stored in Queens lysis buffer using Qiagen  
235 DNeasy Blood and Tissue Kits (*Qiagen Corp.*, Valencia, CA), and stored in Qiagen  
236 Elution Buffer (*Qiagen Corp.*, Valencia, CA). Whole genome re-sequencing was  
237 performed with Illumina sequencing technology. An Illumina TruSeq gDNA 180 bp  
238 library was created and sequenced on the Illumina HiSeq 2000 platform with 100 bp  
239 read length and three individuals per lane for the parent species, the tree sparrow and  
240 the Italian sparrows from Malta; sparrows from Crete, Corsica and Sicily were  
241 sequenced with four individuals per lane. All re-sequencing was performed by  
242 Genome Quebec at McGill University (Montreal, Canada)

243 (<http://www.genomequebec.com/en/home.html>). Raw data have been deposited at the  
244 NCBI Sequence Read Archive under (Accessions YYYY).

#### 245 **Variant calling and filtering**

246 All raw sequence reads were mapped to a repeat-masked version of the house sparrow  
247 genome<sup>13</sup> using BWA 0.7.8<sup>31</sup> with the mem, -M and -R options. A sorted BAM file  
248 was produced using SAMTOOLS version 1.0<sup>32</sup> using view with the -b, -U and -s  
249 options and a pipe to the sort command. Duplicates were identified and filtered out  
250 using MARKDUPLICATES from PICARD-TOOLS version 1.107  
251 (<http://broadinstitute.github.io/picard/>) using the options validation stringency =  
252 lenient, assume sorted = true and index = true. Indels were identified using  
253 RealignerTargetCreator and local realignments around these were performed with  
254 IndelRealigner. Standard settings were used for both these tools which are  
255 components of GATK 3.3.0<sup>33,34</sup>. Final sequencing coverage of these final BAM files  
256 (excluding duplicates) was 8x per individual (min. 5.99x, max. 15.8x; Supplementary  
257 Table 2). Variants were then called using the GATK HaplotypeCaller. First,  
258 HaplotypeCaller was run separately for each individual to create single-sample  
259 gVCFs using the --emitRefConfidence GVCF, --variant\_index\_type LINEAR and --  
260 variant\_index\_parameter 128000 options, and then GATK GenotypeGVCFs tool was  
261 run using standard settings to achieve joint genotyping. Two different versions of the  
262 VCF file were created one with variable sites only (49 237 560 SNPs), and one where  
263 all sites were called as specified by the --includeNonVariantSites option (1 040 518  
264 317 SNPs).

265

266 For both VCF files, indels were first filtered out using VCFtools version 0.1.12b<sup>35</sup>,

267 and hard filtering according to the Broad Institute's recommendations was performed  
268 with bcftools-1.2<sup>32</sup> in order to filter out sequencing artefacts. This included requiring  
269 a QualByDepth of at least 2.0 and a FisherStrand phred-scaled p-value of less than  
270 60.0, based on Fisher's Exact Test to detect strand bias in the reads, which may be  
271 indicative of false positive calls. Hard filtering also required a RMSMappingQuality  
272 of at least 40.0 to ensure high mapping quality of the reads across all samples, a  
273 MappingQualityRankSumTest value of -12.5 to exclude reads where the alternate  
274 alleles has a lower mapping quality than reads with the reference allele, and finally a  
275 ReadPosRankSumTest value of less than -8.0 was required to ensure that reads with  
276 the alternate allele were not shorter those with the reference allele, potentially  
277 indicating sequencing artefacts. In addition, we filtered out sites with mean number of  
278 reads per individual lower than 3, with a genotype quality lower than 20 and with a  
279 mapping quality lower than 20 using VCFtools version 0.1.12b<sup>35</sup>. To avoid paralogs,  
280 we also excluded sites with read depths above 5 times the variance of coverage. This  
281 left a total of 38 341 426 sites for further analysis.

## 282 **PCA**

283 Principal component analysis was performed using ANGSD<sup>36</sup> version 0.911 and  
284 ngsTools version 1.0.1<sup>37</sup>. This pipeline was chosen because it does not rely on  
285 genotype calls but instead takes allele frequency likelihoods and genotype  
286 probabilities into account<sup>38</sup>. We first estimated genotype probabilities from BAM files  
287 with ANGSD, including bi-allelic sites only and allowing a minimum mapping and  
288 site quality of 20 (Phred score) and a minimum coverage of 30x across all individuals.  
289 PCA was then performed using ngsTools on genotype probabilities. Allele  
290 frequencies were normalized and genotypes were not explicitly called, as specified by  
291 setting the options -norm 0 and -call 0 options. Eigenvalues for each PC were then

292 estimated from the covariance matrix produced by ngsTools and data was plotted  
293 using a custom R script. We used the broken stick criteria to assess which PC axes  
294 were biologically informative from a simple scree plot and then extracted the  
295 covariance from these axes (Supplementary Table 3). The analysis was performed on  
296 three datasets: all sites, sites from the Z chromosome only, and autosomal sites only.

### 297 **Population genomic analysis**

298 Population genetic parameters were estimated for non-overlapping 100 kb windows  
299 along the genome, as this window size was larger than the distance of LD-decay<sup>13</sup>.  
300 Population genetic inference was based on genotype likelihoods whenever possible.  
301 ANGSD<sup>36</sup> version 0.911 was used to estimate allele frequency likelihoods and to  
302 obtain a maximum likelihood estimate of the unfolded site frequency spectrum (SFS)  
303 for estimation of Tajima's D. Nucleotide diversity was estimated by dividing the  
304 pairwise Theta (population scaled mutation rate) estimates by the number of variable  
305 sites per window. The ancestral sequence was reconstructed using genotypes from the  
306 outgroup tree sparrow. A Fasta file of the tree sparrow genome was obtained by using  
307 the -doFasta 2 command with the -GL 1 -doCounts 1, -setMinDepth 3 and -  
308 setMaxDepth 65 options in ANGSD<sup>36</sup> version 0.911. Here, BAM files from eight  
309 additional tree sparrows, sequenced to 8-12x depth and processed as described for the  
310 other samples above, were used. Genetic differentiation ( $F_{ST}$ ) based on genotype  
311 likelihood was estimated based on the two-dimensional SFS using ngsTools<sup>38</sup>. All  
312 these analyses were performed on the final BAM files. Sequence divergence ( $d_{xy}$ ) was  
313 calculated from the VCF file with all positions called using the script developed in<sup>39</sup>  
314 ([https://github.com/johnomics/Martin\\_Davey\\_Jiggins\\_evaluating\\_introgession\\_statis](https://github.com/johnomics/Martin_Davey_Jiggins_evaluating_introgession_statistics/blob/master/egglib_sliding_windows.py)  
315 [tics/blob/master/egglib\\_sliding\\_windows.py](https://github.com/johnomics/Martin_Davey_Jiggins_evaluating_introgession_statistics/blob/master/egglib_sliding_windows.py); version August 2014).

### 316 **Admixture analysis**

317 Genetic admixture was estimated using ADMIXTURE<sup>40</sup> version 0.911. The VCF-file  
318 was converted to plink's PED format using VCFtools version 0.1.12b<sup>35</sup> and plink  
319 version 1.07<sup>41</sup>. Log likelihood values for K, the number of genetic clusters in the  
320 datasets, between K=1 and K=8 were estimated (Supplementary Table 4), and  
321 admixture analyses were run for the most appropriate value of K. Analyses were first  
322 run for a LD-pruned whole genome dataset (sites within a 50 SNP stepping window  
323 with a correlation coefficient higher than 0.1 were omitted; pruning of the BED file  
324 was performed with plink version 1.07 using the --indep-pairwise command; this left  
325 438,443 sites for analysis). Sliding window analyses with 100 kb windows were then  
326 carried out to investigate variability in probability of parental inheritance across the  
327 genome. This analysis was performed individually for each island population together  
328 with the two parent species. The VCF-file was then split into individual VCF files per  
329 100 kb using the -L option in GATK 3.3.0<sup>33,34</sup>. Individual ADMIXTURE analyses for  
330 K=2 were then performed for each 100 kb BED file. A mean estimated cluster  
331 assignment probability for all individuals per population was computed for each  
332 analysis using a custom python script.

### 333 **Phylogenetic analyses**

334 To investigate whether phylogenetic relationships varied across the genome due to  
335 introgression or incomplete lineage sorting, a machine-learning approach  
336 implemented in SAGUARO version 0.1<sup>42</sup> was used to identify genomic regions  
337 characterized by distinct similarity matrices. To focus on breakpoints at which  
338 recombination led to changes in the topology of populations or species, rather than  
339 topological changes within populations, one representative high-coverage individual  
340 per Italian sparrow population or sparrow species was used in these analyses. These

341 were the house sparrow 8L19786, the Spanish sparrow Lesina\_280 and the Italian  
342 sparrows C081 (Crete), K035 (Corsica), S059 (Sicily) and M036 (Malta). The  
343 program VCF2HMMFeature (included in the SAGUARO package) was used to  
344 convert the VCF-file to the HMMFeature format required by SAGUARO, and  
345 SAGUARO was run using default parameters. Analysis was performed jointly for all  
346 chromosomes, as the same similarity matrices are expected to occur on multiple  
347 chromosomes. A total of 797 contiguous regions of up to 54,398 bp were identified  
348 and assigned to one out of 41 similarity matrices, of which the most common  
349 similarity matrix characterized 79.08% of the genome. Similarity matrices represented  
350 by more than 2% of the genome are depicted in Figure 1.

351 The genomic regions identified by SAGUARO were subsequently used to infer  
352 differences in phylogenetic relationships more thoroughly with the Bayesian software  
353 BEAST version 2.2.0<sup>43</sup>. To this end, chromosome-length alignments were first phased  
354 using SHAPE-IT version 2<sup>44</sup>. To improve phasing, this analysis was conducted with a  
355 subset consisting of the six individuals with the highest coverage per population (24  
356 individuals in total) rather than just the six individuals used for SAGUARO analyses,  
357 however, the six focal individuals were extracted from the alignments following  
358 phasing. The phased chromosome-length alignments were then used to extract 38,964  
359 non-overlapping blocks of 25,000 bp from the 797 contiguous regions identified with  
360 SAGUARO. For each of the 38,964 blocks, one of the two phased sequences per  
361 individual was excluded at random, so that each alignment contained a single  
362 sequence per population or species. To identify alignments particularly suitable for  
363 Bayesian phylogenetic analysis, we quantified, for each alignment, the proportion of  
364 missing data, the number of parsimony-informative sites, the proportion of  
365 heterozygous sites, the mean bootstrap support of maximum-likelihood trees



366 generated with RAXML version 8.2.4<sup>45</sup>, and the probability that the alignment is free  
367 of recombination determined with the Phi test<sup>46</sup>. We assumed that alignments with a  
368 low proportion of heterozygous sites are less likely to contain paralogous sequences,  
369 and that alignments with many parsimony-informative sites and high mean bootstrap  
370 support contain strong phylogenetic signal. Thus, alignments were selected according  
371 to the following “relaxed” and “strict” filters: a proportion of missing data below 0.2  
372 (relaxed) or 0.1 (strict), at least 75 (relaxed) or 100 (strict) parsimony-informative  
373 sites, a proportion of heterozygous sites below 0.005 (relaxed) or 0.0025 (strict), a  
374 mean bootstrap support of at least 90 (both relaxed and strict), and a Phi test *p*-value  
375 above 0.005 (relaxed) or 0.01 (strict). A total of 1,234 and 116 alignments were  
376 selected with these relaxed and strict filters, respectively. To include an outgroup for  
377 phylogenetic analyses with BEAST, consensus sequences of tree sparrow reads from  
378 the Naxos1 individual mapped to the house sparrow reference genome<sup>13</sup> were added  
379 to each selected alignment. To avoid bias towards the reference, missing data were  
380 not replaced by the reference alleles. The phylogeny of each alignment was then  
381 inferred with BEAST, using the GTR model of sequence evolution with estimated  
382 base frequencies, a Yule tree prior<sup>47</sup>, and 50 million Markov chain Monte Carlo  
383 iterations. The ingroup, combining house sparrow, Spanish sparrow, and the  
384 representatives of Italian sparrow populations was constrained to be monophyletic. In  
385 the absence of a reliable absolute time line for sparrow divergences, the time of  
386 divergence of ingroup and outgroup was fixed at 1 time unit, so that all divergence  
387 ages within the ingroup are estimated relative to this initial split. Convergence of all  
388 MCMC chains was confirmed by effective samples sizes greater than 500 for all  
389 model parameters.

## 390 **Introgression**

391 Presence of introgression was estimated using Patterson's  $D^{48,49}$  calculations, using  
392 the scripts provided in<sup>39</sup>. ABBA-BABA estimates were calculated using a minimum  
393 coverage of 3, a 100 kb window size and 1000 informative sites using the  
394 `egglib_sliding_windows.py` script. The test was set up to estimate Spanish sparrow  
395 introgression into a house sparrow background, with tree sparrow as an outgroup.

#### 396 **Mitochondrial DNA**

397 Mitochondrial DNA gvcfs were called separately with haploid settings using the  
398 `-ploidy` argument in HaplotypeCaller, jointly genotyped, and filtered as described  
399 above using GATK 3.3.0<sup>33,34</sup>. Fitchi version 1.1.4<sup>50</sup> was used to reconstruct a  
400 haplotype genealogy based on Fitch distances.

#### 401 **Recombination rate and common differentiation**

402 Genome-wide recombination rates were estimated using a house sparrow linkage  
403 map. As the recombination map was produced using SNP chip data, recombination  
404 distance estimates were first averaged using a sliding window approach and then a  
405 loess fit of mean recombination rate against physical distance was performed in order  
406 to interpolate fine scale variation across non-overlapping 100 kb windows. Since  
407 recombination data were not available for the Z chromosome, this interpolation was  
408 performed on autosomes only.

409 To test whether there was a relationship between recombination rate variation and  
410 relative genomic differentiation, either  $F_{ST}$  from 100 kb non-overlapping windows,  
411 which is a direct measure of relative differentiation, or the common differentiation  
412 axis – i.e. shared differentiation amongst groups of populations – were used. The  
413 latter was calculated by performing PCA on multiple pairwise comparisons of  
414 differentiation featuring the same focal species following<sup>51</sup>. Common differentiation

415 was estimated amongst 1) all Italian populations, 2) between all Italian populations  
416 and the house sparrow and 3) between all Italian populations and the Spanish  
417 sparrow. In each case, all pairwise  $F_{ST}$  comparisons including these species were  
418 included, and the first principal component extracted.

#### 419 **Outlier gene analysis**

420 Disparities in  $F_{ST}$  values between lineages were used to identify genomic regions in  
421 which the Italian sparrow populations display elevated divergence from either or both  
422 of their parents or other Italian sparrow populations. This approach is reminiscent to  
423 population branch statistics. Three categories of outliers were of interest: Between  
424 island outliers, where island populations differed strongly in parental resemblance,  
425 were selected as these are informative of how Italian sparrow populations are  
426 differentially adapted. Private outliers, windows in which Italian sparrows are  
427 diverged from both parent species, show where unique adaptation is putatively  
428 strongly selected for. Finally, portions of the genome invariably inherited from the  
429 same parent species for all populations are informative of parts that are under strong  
430 selection to resemble a specific parent species and may reveal constraints on hybrid  
431 speciation.

#### 432 Between island outliers:

433 The 1% of 100 kb regions which differed most with respect to  $F_{ST}$  against the parental  
434 species between two islands were selected for all possible island-island combinations.  
435 All genes within or partly within these regions were then extracted. As historical  
436 effects such as ancestral polymorphism and selection prior to the parental split can be  
437 assumed to be constant across Italian populations, using the difference in  $F_{ST}$  against  
438 the same parent species will yield results which are not dependent on these factors.

439 Furthermore,  $F_{ST}$  was not strongly dependent on recombination rate between Italian  
440 sparrow populations (Supplementary Fig. 4).

441 Private Outliers:

442 Outliers in which Italian sparrows were differentiated from both parent species,  
443 hereafter private outliers, were extracted from the 1% of windows exhibiting the  
444 largest difference in  $F_{ST}$  between each hybrid/parent comparison, only keeping  
445 windows overlapping between both hybrid/parent comparisons. This was done  
446 separately for each Italian population, and all outliers detected across the populations  
447 were then merged for gene ontology analyses.

448 Outliers invariably resembling one parent species:

449 To limit historical effects, due to for instance ancestral polymorphism and selection  
450 prior to the parental split, we used the 100 kb windows in which the Italian sparrow  
451 had the cumulative largest difference in  $F_{ST}$  value between one parent and the other.  
452 This was achieved by summing the  $F_{ST}$  values between all Italian sparrow populations  
453 and house sparrow, and subtract the sum of the  $F_{ST}$  values between these populations  
454 and Spanish sparrow. As the resulting distribution was skewed, using a percentage at  
455 each tail would not have captured the biological pattern where house sparrow  
456 inheritance across populations was more common than Spanish sparrow inheritance  
457 across all populations. Therefore, we squared the summed values and extracted the  
458 2% of the windows that deviated most strongly from 0 (Supplementary Fig. 8B),  
459 which yielded more invariably house sparrow like outliers than invariably Spanish  
460 sparrow like outliers.

461 For all outlier windows in each of the three categories above, annotated genes that  
462 resided completely or partially within them were extracted for separate gene ontology

463 analysis. One analysis was performed on all private outliers identified across  
464 populations, one on all outliers between populations, including all combinations of  
465 populations, one on outliers that resembled house sparrow across all populations, and  
466 finally one on outliers that resembled Spanish sparrow across all populations. As only  
467 14 outliers resembling Spanish sparrow across all populations were found, no  
468 significant GO-terms were found for this analysis. Therefore, we do not provide a  
469 table of significant terms for this analysis. These analyses were performed using GO-  
470 stat<sup>52</sup>, with a human reference base. We implemented standard settings for GO  
471 analyses, i.e. a values of 3 as the minimal length of considered GO paths and no  
472 merging of GOs if gene lists overlap. Mito-nuclear genes were identified using  
473 MITOMINER 4.0<sup>53</sup> with a human reference database and standard settings.  
474 Overrepresentation of mitonuclear genes was subsequently tested using a Chi-square  
475 test. Corrections for multiple testing were performed with the Benajmini method.

476

#### 477 **DN/DS analyses**

478 To test if the Z chromosome was under stronger selection, synonymous and non-  
479 synonymous fixed differences within genes against each parent species for all  
480 autosomes and the Z chromosome were estimated for each Italian sparrow population.  
481 A goodness of fit test was applied to test if the number of nonsynonymous  
482 substitutions on the Z chromosome was higher than expected for each parent species.  
483 To this end, the R package PopGenome<sup>54</sup> was used. The `splitting.data` command was  
484 used to extract genes and fixed sites were extracted. Synonymous and  
485 nonsynonymous sites were then identified using the options `subsites="syn"` and  
486 `subsites="nonsyn"`, respectively.

487

488 **Linkage disequilibrium decay**

489 To address whether linkage disequilibrium (LD) was higher and LD decayed more  
490 slowly in outlier windows than in randomly selected windows, plink version  
491 1.90b3b<sup>41</sup> was used. Using `--const-fid --ld-window 1000 --ld-window-kb 100 --r2` and  
492 `--ld-window-r2 0.0`, linkage disequilibrium in the 100 kb outlier windows was  
493 estimated within each of the Italian populations. In addition, we randomly selected  
494 1,000 100 kb windows spread across the chromosomes in proportion with  
495 chromosome size and estimated linkage disequilibrium for these in the same manner  
496 for comparison. A linear model was fitted for each outlier window, and intercept and  
497 slope were recorded and used in glm's to test whether LD was higher and LD decay  
498 was slower in outlier windows than in randomly selected windows.

499 **References**

- 500 1. Mallet, J. Hybridization as an invasion of the genome. *Trends Ecol. Evol.* **20**,  
501 229–237 (2005).
- 502 2. Abbott, R. et al. Hybridization and speciation. *J. Evol. Biol.* **26**, 229–246  
503 (2013).
- 504 3. Seehausen, O. Hybridization and adaptive radiation. *Trends Ecol. Evol.* **19**,  
505 198–207 (2004).
- 506 4. The Heliconius Genome Sequencing Consortium. Butterfly genome reveals  
507 promiscuous exchange of mimicry adaptations among species. *Nature* **487**, 94–98  
508 (2012).
- 509 5. Rieseberg, L. H. Major Ecological Transitions in Wild Sunflowers Facilitated  
510 by Hybridization. *Science* **301**, 1211–1216 (2003).
- 511 6. Hermansen, J. S. et al. Hybrid speciation in sparrows I: phenotypic  
512 intermediacy, genetic admixture and barriers to gene flow. *Mol. Ecol.* **20**, 3812–3822  
513 (2011).
- 514 7. Trier, C. N., Hermansen, J. S., Sætre, G.-P. & Bailey, R. I. Evidence for Mito-  
515 Nuclear and Sex-Linked Reproductive Barriers between the Hybrid Italian Sparrow  
516 and Its Parent Species. *PLoS Genet* **10**, e1004075–10 (2014).
- 517 8. Sankararaman, S. et al. The genomic landscape of Neanderthal ancestry in  
518 present-day humans. *Nature* **507**, 354–357 (2014).
- 519 9. Fontaine, M. C. et al. Extensive introgression in a malaria vector species  
520 complex revealed by phylogenomics. *Science* **347**, 1258524–1258524 (2015).
- 521 10. Baack, E. J. & Rieseberg, L. H. A genomic view of introgression and hybrid  
522 speciation. *Curr. Opin. Genet. Dev.* **17**, 513–518 (2007).

- 523 11. Martin, S. H. et al. Genome-wide evidence for speciation with gene flow in  
524 *Heliconius* butterflies. *Genome Res.* **23**, 1817–1828 (2013).
- 525 12. Qvarnström, A. & Bailey, R. I. Speciation through evolution of sex-linked  
526 genes. *Heredity* **102**, 4–15 (2008).
- 527 13. Elgvin, T. O. et al. The genomic mosaicism of hybrid speciation. In review,  
528 *Science Advances*. *MS attached in submission*.
- 529 14. Saetre, G. P. et al. Single origin of human commensalism in the house  
530 sparrow. *J. Evol. Biol.* **25**, 788–796 (2012).
- 531 15. Bache-Mathiesen, L. The Evolutionary Potential of Male Plumage Color in a  
532 Hybrid Sparrow Species. UiO DUO vitenarkiv  
533 <https://www.duo.uio.no/handle/10852/45473>
- 534 16. Burri, R. et al. Linked selection and recombination rate variation drive the  
535 evolution of the genomic landscape of differentiation across the speciation continuum  
536 of *Ficedula* flycatchers. *Genome Res.* **25**, 1656–1665 (2015).
- 537 17. Hill, W. G. & Robertson, A. The effect of linkage on limits to artificial  
538 selection. *Genet. Res.* **8**, 269–294 (1966).
- 539 18. Laine, V. N. et al. Evolutionary signals of selection on cognition from the  
540 great tit genome and methylome. *Nat. Commun.* **7**, 1–9 (2016).
- 541 19. Lamichhaney, S. et al. Evolution of Darwin’s finches and their beaks revealed  
542 by genome sequencing. *Nature* **518**, 371–375 (2015).
- 543 20. Eroukhmanoff, F., Hermansen, J. S., Bailey, R. I., Sæther, S. A. & Sætre, G.-  
544 P. S. Local adaptation within a hybrid species. *Heredity* **111**, 286–292 (2013).
- 545 21. Noramly, S., Freeman, A. & Morgan, B. A. Beta-catenin signaling can initiate  
546 feather bud development. *Development* **126**, 3509–3521 (1999).



- 547 22. Guo, H. et al. Wnt/beta-catenin signaling pathway activates melanocyte stem  
548 cells in vitro and in vivo. *J. Dermatol. Sci.* **83**, 45–51 (2016).
- 549 23. Mank, J. E., Nam, K. & Ellegren, H. Faster-Z evolution is predominantly due  
550 to genetic drift. *Mol. Biol. Evol.* **27**, 661–670 (2010).
- 551 24. Charlesworth, B., Coyne, J. A. & Barton, N. H. The Relative Rates of  
552 Evolution of Sex Chromosomes and Autosomes. *Am. Nat.* **130**, 113–146 (2016).
- 553 25. David, W. M., Mitchell, D. L. & Walter, R. B. DNA repair in hybrid fish of  
554 the genus *Xiphophorus*. *Comp. Biochem. Physiol. C Toxicol. Pharmacol.* **138**, 301–  
555 309 (2004).
- 556 26. Greig, D., Travisano, M., Louis, E. J. & Borts, R. H. A role for the mismatch  
557 repair system during incipient speciation in *Saccharomyces*. *J. Evol. Biol.* **16**, 429–  
558 437 (2003).
- 559 27. Schumer, M. & Brandvain, Y. Determining epistatic selection in admixed  
560 populations. *Mol. Ecol.* **25**, 2577–2591 (2016).
- 561 28. Barton, N. H. The role of hybridization in evolution. *Mol. Ecol.* **10**, 551–568  
562 (2001).
- 563 29. Poelstra, J. W., Vijay, N., Hoepfner, M. P. & Wolf, J. B. W. Transcriptomics  
564 of colour patterning and coloration shifts in crows. *Mol. Ecol.* **24**, 4617–4628 (2015).
- 565 30. Tomarev, S. I. & Nakaya, N. Olfactomedin Domain-Containing Proteins:  
566 Possible Mechanisms of Action and Functions in Normal Development and  
567 Pathology. *Mol. Neurobiol.* **40**, 122–138 (2009).

## 568 **Additional References for Methods Section**

- 569 31. Li, H. & Durbin, R. Fast and Accurate Short Read Alignment with Burrows-  
570 Wheeler Transform. *Bioinformatics* **25**, 1754–1760 (2009).
- 571 32. Li, H. et al. The Sequence Alignment/Map format and SAMtools.  
572 *Bioinformatics* **25**, 2078–2079 (2009).
- 573 33. McKenna, A. et al. The Genome Analysis Toolkit: A MapReduce framework  
574 for analyzing next-generation DNA sequencing data. *Genome Res.* **20**, 1297–1303  
575 (2010).
- 576 34. Van der Auwera, G. A. et al. From FastQ Data to High-Confidence Variant  
577 Calls: The Genome Analysis Toolkit Best Practices Pipeline. *Curr. Protoc.*  
578 *Bioinformatics.* **11**, 1–33 (2013).
- 579 35. Danecek, P. et al. The variant call format and VCFtools. *Bioinformatics* **27**,  
580 2156–2158 (2011).
- 581 36. Korneliussen, T. S., Albrechtsen, A. & Nielsen, R. ANGSD: Analysis of Next  
582 Generation Sequencing Data. *BMC Bioinformatics* **15**, 443–13 (2014).
- 583 37. Fumagalli, M., Vieira, F. G., Linderoth, T. & Nielsen, R. ngsTools: methods  
584 for population genetics analyses from next-generation sequencing data.  
585 *Bioinformatics* **30**, 1486–1487 (2014).
- 586 38. Fumagalli, M. et al. Quantifying Population Genetic Differentiation from  
587 Next-Generation Sequencing Data. *Genetics* **195**, 979–992 (2013).
- 588 39. Martin, S. H., Davey, J. W. & Jiggins, C. D. Evaluating the Use of ABBA-  
589 BABA Statistics to Locate Introgressed Loci. *Mol. Biol. Evol.* **32**, 244–257 (2014).
- 590 40. Alexander, D. H., Novembre, J. & Lange, K. Fast model-based estimation of  
591 ancestry in unrelated individuals. *Genome Res.* **19**, 1655–1664 (2009).

- 592 41. Purcell, S. et al. PLINK: A Tool Set for Whole-Genome Association and  
593 Population-Based Linkage Analyses. *Am. J. Hum. Genet.* **81**, 559–575 (2007).
- 594 42. Zamani, N. et al. Unsupervised genome-wide recognition of local relationship  
595 patterns. *BMC Genomics* **14**, 1-11 (2013).
- 596 43. Bouckaert, R. et al. BEAST 2: A Software Platform for Bayesian Evolutionary  
597 Analysis. *PLoS Comput. Biol.* **10**, e1003537–6 (2014).
- 598 44. O'Connell, J. et al. A General Approach for Haplotype Phasing across the Full  
599 Spectrum of Relatedness. *PLoS Genet.* **10**, e1004234–21 (2014).
- 600 45. Stamatakis, A. RAxML version 8: a tool for phylogenetic analysis and post-  
601 analysis of large phylogenies. *Bioinformatics* **30**, 1312–1313 (2014).
- 602 46. Bruen, T. C., Philippe, H. & Bryant, D. A simple and robust statistical test for  
603 detecting the presence of recombination. *Genetics* **172**, 2665–2681 (2006).
- 604 47. Yule, U. G. A Mathematical theory of evolution, based on the conclusions of  
605 Dr. J. C. Willis, F.R.S. *Philos. Trans. R. Soc. Lond. B. Biol. Sci.* **213**, 21–87 (1925).
- 606 48. Green, R. E. et al. A draft sequence of the Neandertal genome. *Science* **328**,  
607 710–722 (2010).
- 608 49. Durand, E. Y., Patterson, N., Reich, D. & Slatkin, M. Testing for Ancient  
609 Admixture between Closely Related Populations. *Mol. Biol. Evol.* **28**, 2239–2252  
610 (2011).
- 611 50. Matschiner, M. Fitchi: haplotype genealogy graphs based on the Fitch  
612 algorithm. *Bioinformatics* **32**, 1250–1252 (2016).
- 613 51. Burri, R. et al. Linked selection and recombination rate variation drive the  
614 evolution of the genomic landscape of differentiation across the speciation continuum  
615 of *Ficedula* flycatchers. *Genome Res.* **25**, 1656–1665 (2015).

- 616 52. Beissbarth, T. & Speed, T. P. GOstat: find statistically overrepresented Gene  
617 Ontologies within a group of genes. *Bioinformatics* **20**, 1464–1465 (2004).
- 618 53. Smith, A. C., Blackshaw, J. A. & Robinson, A. J. MitoMiner: a data  
619 warehouse for mitochondrial proteomics data. *Nucleic Acids Res.* **40**, D1160–D1167  
620 (2011).
- 621 54. Pfeifer, B., Wittelsbürger, U., Ramos-Onsins, S. E. & Lercher, M. J.  
622 PopGenome: an efficient Swiss army knife for population genomic analyses in R.  
623 *Mol. Biol. Evol.* **31**, 1929–1936 (2014).
- 624

625 **Supplementary Information** is linked to the online version of the paper at

626 [www.nature.com/nature](http://www.nature.com/nature).

627

## 628 **Acknowledgements**

629 We thank Maria Tesaker and BirdLife Malta for help with field work, Laura Piñeiro  
630 and Lena Bache-Mathiesen for providing morphological data, and Anna Nilsson for  
631 comments on the manuscript. This work was funded by a Swedish Research Council  
632 post doctoral grant and a Wenner-Gren Fellowship to A.R. and a Norwegian Science  
633 Foundation grant to G-P.S. and A.R.

634

## 635 **Author Contributions**

636 A.R. conceived the study, carried out field work, lab work, designed analyses,  
637 analysed data and wrote the manuscript. C.N.T. helped design analyses, and provided  
638 example scripts for many analyses, F.E. carried out field work and the gene ontology  
639 analyses, J.S.H. carried out field work and the final touches in figure preparation,  
640 M.M. did the BEAST and Saguaro analyses and M.R. performed the recombination  
641 rate analyses and PCA. T.E. provided the house sparrow reference genome, and  
642 G.P.S. identified the study system, designed the sampling strategy and carried out  
643 field work. All co-authors commented on the manuscript.

644

645 Data is deposited at YYYY. Reprints and permissions information is available at

646 [www.nature.com/reprints](http://www.nature.com/reprints). We declare no competing financial interests.

647 Correspondence and requests for materials should be addressed to

648 [anna.runemark@ibv.uio.no](mailto:anna.runemark@ibv.uio.no)

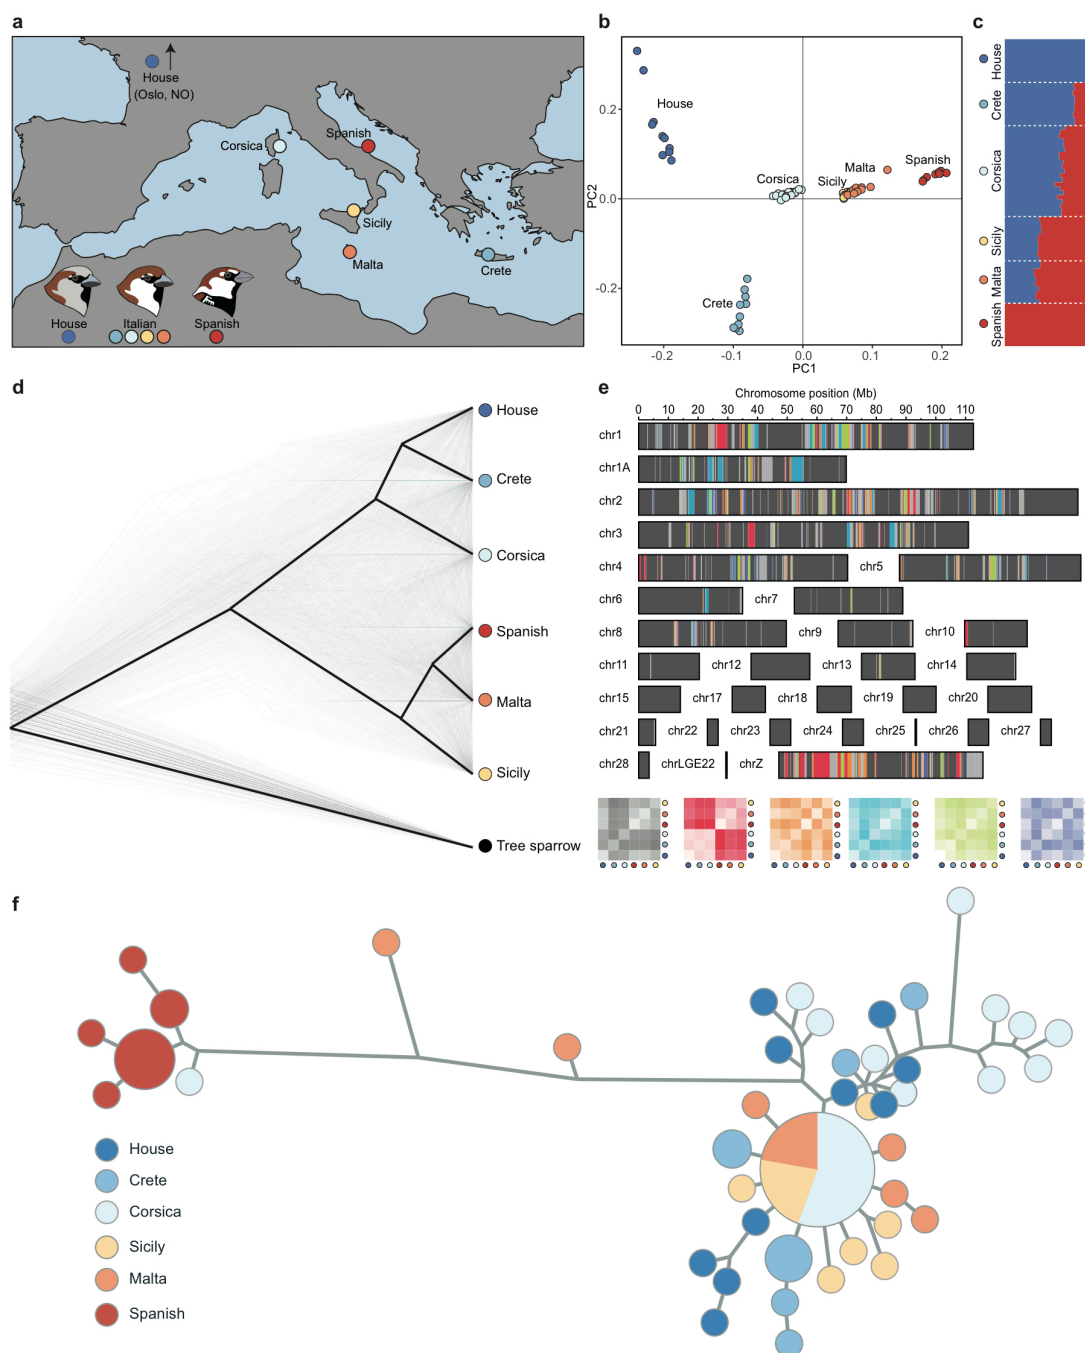

649  
 650 **Figure 1. Population structuring of the focal taxa.** **a**, Map showing the location of  
 651 the island populations and the reference parent species populations, with examples of  
 652 male plumage patterns. **b**, PCA of LD-pruned high quality SNP set with eigenvector 1  
 653 on the x-axis and eigenvector 2 on the y-axis. **c**, Population structuring based on  
 654 Admixture analysis for house sparrow, Italian and Spanish sparrow populations. **d**,  
 655 BEAST trees illustrating genome-wide variation in phylogenetic clustering between  
 656 the taxa. **e**, SAGUARO plot illustrating the distribution of the six most common  
 657 relatedness matrixes over the genome. **f**, Haplotype genealogy graph of mitochondrial  
 658 sequences.

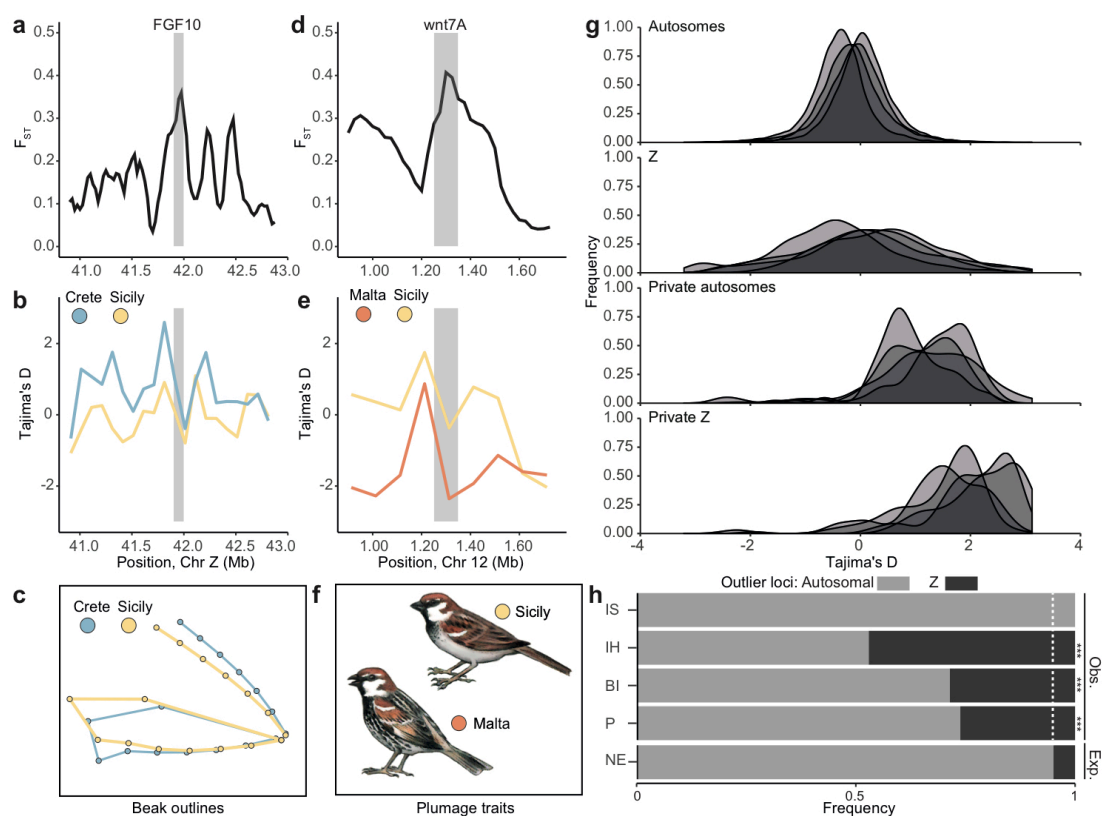

659

660 **Figure 2. Local adaptation, private variation, and strong selection on the Z-**  
 661 **chromosome. a**, The beak shape candidate gene FGF10 is differentiated between  
 662 Italian sparrows on Crete and Sicily. **b**, Tajima's D for the FGF10 region. **c**, Beak  
 663 shape differences between Cretan and Sicilian sparrows. **d**, The plumage candidate  
 664 gene wnt7a is differentiated between genetically similar sparrow populations on  
 665 Sicily and Malta. **e**, Tajima's D for the wnt7a region. **f**, Schematic illustration of  
 666 plumage differences between the populations. **g**, Strength of selection on the  
 667 autosomes, the Z-chromosome and on private outlier loci where the Italian sparrow is  
 668 differentiated from both parent species. **h**, Distribution of outlier genes between the  
 669 Z-chromosome and the autosomes. IS denotes invariably Spanish, IH invariably  
 670 house, BI between islands, P private and NE neutral expectations.

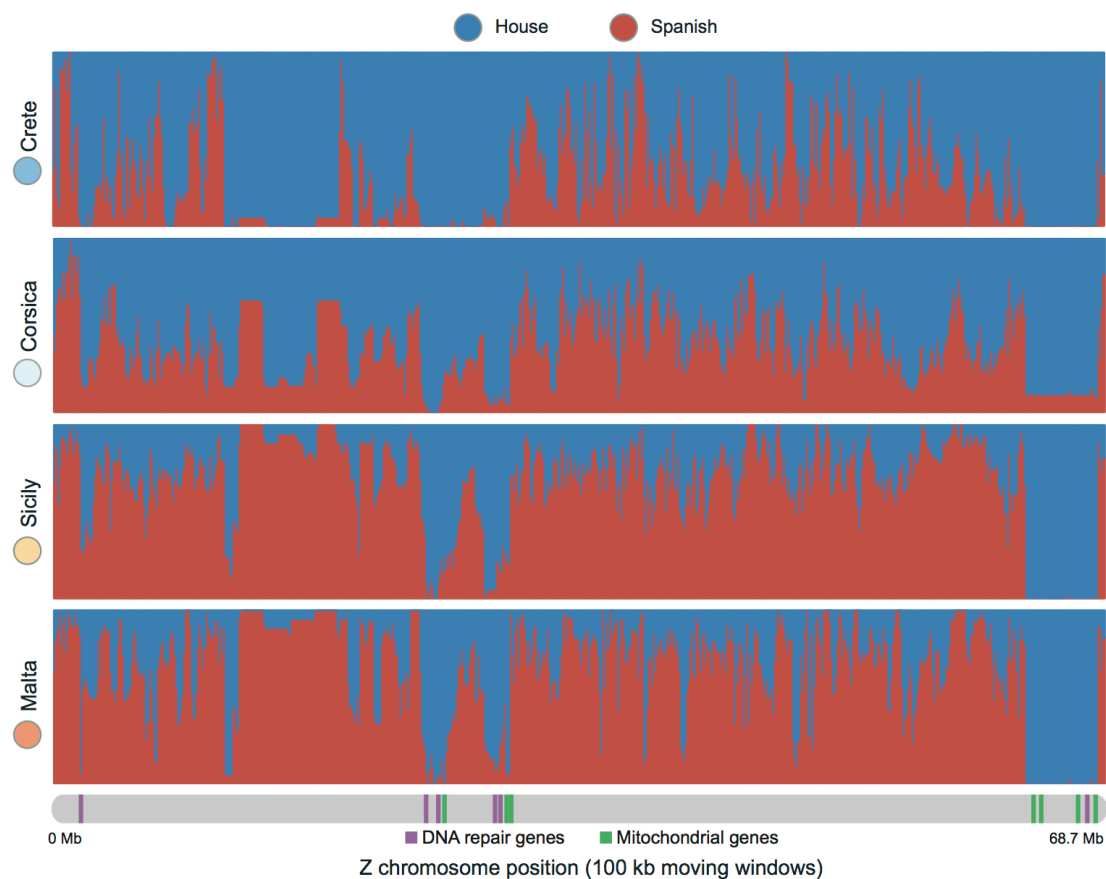

671

672 **Figure 3. Parental similarity across the Z-chromosome.** Sliding window

673 ADMIXTURE analysis of probability of house sparrow (blue) or Spanish sparrow

674 (red) inheritance over the Z-chromosome for the four Italian sparrow populations.

675 Areas highly constrained to house sparrow inheritance harbour a significantly higher

676 proportion DNA repair genes (green lines) and many mito-nuclear (purple lines)

677 genes.
